# Supplementary material for: HER2-driven mammary tumorigenesis enhances bioenergetics despite reductions in mitochondrial content
Source: eLife. 2026 May 6;14:RP104079. doi: 10.7554/eLife.104079 (PMC13148823; doi:10.7554/eLife.104079)
Supplement: Supplementary file 1. — General pathways or functions are listed per protein based on ID mapping from the Uniprot protein sequence database. Adjusted p-values are listed per target. [file elife-104079-supp1.xlsx]

## Sheet: Supplementary File 1
Abbrev.	Protein	Pathway/Function	Fc (vs BEN)	p.adj
PGK1	Phosphoglycerate kinase	Glycolysis	2.48	0.068
KPYM	Pyruvate kinase	Glycolysis	3.17	0.048
MP2K4	Mitogen activated protein kinase kinase 4	MAPK Pathway	3.65	0.012
RL38	Large ribosomal subunit protein eL38	Protein synthesis/translation	4.11	0.078
PGTA	Geranylgeranyl transferase type-2 subunit alpha	Cysteine prenylation of Rab proteins	4.28	0.067
Rl23	Large ribosomal subunit protein uL14	Protein synthesis/translation	4.41	0.042
CADH1	Cadherin-1	Cell adhesion and motility, epithelial cell marker	12.75	0.084
LMCD1	LIM and cysteine rich domains protein 1	Transcriptional cofactor for GATA6 involved in cell proliferation and metastasis (MMP, EGFR)	15.26	0.077
MPRI	Cation independent mannose 6 phosphate receptor	Lysosomal/Golgi trafficking, associates with IGFR2	22.3	0.093
